# Supplementary material for: Correlation between anthropometric and biological parameters of the offspring and parental plasma 25-hydroxyvitamin D levels: a cross-sectional study conducted at Oran, Algeria.
Source: Research Square preprint supplement (doi:10.21203/rs.3.rs-5930305/v1), 2025-04-29
Supplement: Supplementary file 1 [file 8d2d6754689401b3f4366ad7.docx]

Recruitment Questionnaire

Date: / / Tel: Family Number:

Last Name : Father's First Name: Date of birth: / /

Address:

*Date and season of blood sampling:* / /

Winter Summer Spring Autumn

Weight: Height: BMI:

*Blood Pressure:* systolic diastolic

*Skin color:* Black White

- Do you have liver disease? Yes No

- Do you have kidney disease? Yes No

- Do you have hyperparathyroidism? Yes No

- Do you have chronic inflammatory bowel disease? Yes No

- Do you take vitamin D supplements? Yes No

*Education level:*

Never attended school Primary education

Secondary education Higher education

*Household size:*

3 to 4 members 5 to 6 members more than 6 members

*Housing occupation status:*

Own a detached house Housed by the employer Renting an empty rented residence Tenant of a furnished rented home Housing provided for free

*Occupation type:*

Low income Moderate income High income

*Duration of sun exposure* min

*Smoking:* Yes No Cigarettes / day

Frequency of alcohol consumption: Yes No

1- More than 3 times per day

2- Once per day

3- Rarely

- Have you ever had COVID-19? Yes No

Date: / / Tel: Family Number:

Last Name: Mather's First Name: Date of birth: / /

*Date and season of blood sampling*: / /

Winter Summer Spring Autumn

*Date and season of delivery:* / /

Winter Summer Spring Autumn

*week of delivery*

*Type of delivery:* Vaginal delivery Cesarean section

Weight: Height: BMI:

*Blood Pressure:* systolic diastolic

*Skin color:* Black White

- Do you have liver disease? Yes No

- Do you have kidney disease? Yes No

- Do you have hyperparathyroidism? Yes No

- Do you have diabetes? Yes No

- Do you have hypertension? Yes No

- Do you have chronic inflammatory bowel disease? Yes No

- Do you take vitamin D supplements? Yes No

*Education level:*

Never attended school Primary education

Middle school education Higher education

*Occupation type*

Low income Moderate income High income

*Duration of sun exposure*: min

*Frequency of alcohol consumption*: Yes No

1- More than 3 times per day

2- Once per day

3-Rarely

- Number of previous deliveries:
- Types of previous deliveries:  Cesarean section Vaginal delivery
- Have you had miscarriages?  Yes No
- Do you have sick children?  Yes No Type of illnesses :
- Do you have gestational toxemia? Yes No
- Do you have autoimmune diseases? Yes No
- Do you have heart failure?
- Do you have antiphospholipid antibody syndrome? Yes No
- Do you have lupus (systemic disease)? Yes No
- Do you have abnormal placenta localization Yes No

(placenta previa and accreta) ?

- Have you ever had COVID-19? Yes No
- Do you have anemia? Yes No hemoglobin level: g/l

Date: / / sex: Family Number:

Last name: Newborn's First Name: Date of Birth: / /

Weight: Height: BMI:

Crown-rump length (CRL):

Biparietal diameter (BPD):

Femur length (FL):

Apgar score at 1st min:

Apgar score at 5th min:

**Other information**

-Arteriovenous malformation: single artery (velamentous cord insertion). Yes No

-Fetal distress (umbilical cord torsion). Yes No

-Hemorrhages (feto-maternal transfusion). Yes No

-Abruptio placentae (retroplacental hematoma). Yes No

-Prematurity. Yes No
